# Supplementary material
Source: MDPI journal article supplement (https://www.mdpi.com/2035-8377/15/1/6)
Supplement: s1 [file s1]

# Post-stroke pneumonia in real-world practice: background, microbiological examination, and treatment

Takayoshi Akimoto, Makoto Hara, Masaki Ishihara, Katsuhiko Ogawa, and Hideto Nakajima

## List of Contents

### 1. Supplemental Table:

**Table S1. Sputum culture results of 24 patients with PSP**

| Geckler group classification | Culture results                                                                        | Number |
|------------------------------|----------------------------------------------------------------------------------------|--------|
| Geckler 5                    |                                                                                        |        |
| BSE<10, WBC>25 / field       | <i>Enterobacter aerogenes</i>                                                          | 1      |
| Geckler 4                    | <i>Klebsiella pneumoniae</i>                                                           | 1      |
| BSE<10-15, WBC>25 / field    | MSSA, <i>Streptococcus agalactiae</i>                                                  | 1      |
|                              | <i>Providencia stuartii</i> , <i>Pseudomonas aeruginosa</i> , <i>Proteus mirabilis</i> | 1      |
|                              | <i>Bacillus cereus</i>                                                                 | 1      |
|                              | <i>Escherichia coli</i>                                                                | 1      |
|                              | <i>Klebsiella pneumoniae</i> , MSSA                                                    | 1      |
|                              | <i>Streptococcus agalactiae</i> , <i>Escherichia coli</i>                              | 1      |
|                              | <i>Pseudomonas aeruginosa</i>                                                          | 1      |
| Geckler 3                    | <i>Klebsiella pneumoniae</i> , <i>Serratia marcescens</i>                              | 1      |
| BSE>25, WBC>25 / field       | <i>Haemophilus influenzae</i>                                                          | 1      |
|                              | <i>Streptococcus equisimilis</i> , <i>Serratia marcescens</i> , MRSA                   | 1      |
|                              | <i>Klebsiella spp.</i>                                                                 | 1      |
|                              | MSSA                                                                                   | 1      |
|                              | <i>Stenotrophomonas maltophilia</i>                                                    | 1      |
|                              | <i>Klebsiella pneumoniae</i> , MSSA                                                    | 1      |
|                              | <i>Enterobacter cloacae</i> , <i>Stenotrophomonas maltophilia</i>                      | 1      |
|                              | MSSA, <i>Klebsiella pneumoniae</i> , <i>Streptococcus agalactiae</i>                   | 1      |
| Not detected or Geckler ≤ 2  |                                                                                        | 6      |

BSE: buccal squamous epithelial; MSSA: Methicillin-sensitive *Staphylococcus aureus*; Methicillin-resistant *Staphylococcus aureus*; WBC: white blood cells
